# Supplementary material for: Insulating to metallic behaviour in the cation ordered perovskites Ba2Nd1−xFexMoO6
Source: Royal Society of Chemistry journal article supplement (doi:10.1039/c6tc04875g), 2017-01-01
Supplement: c6tc04875g1.pdf [file c6tc04875g1.pdf]

## SUPPLEMENTARY INFORMATION

### Insulating to Metallic behaviour in the Cation Ordered Perovskites $\text{Ba}_2\text{Nd}_{1-x}\text{Fe}_x\text{MoO}_6$

Fiona C. Coomer,<sup>a</sup> Serena A. Corr,<sup>b</sup> Edmund J. Cussen\*<sup>a</sup>

Pages 2 - 8 Crystallographic Information from Rietveld Refinement against neutron diffraction data.

Pages 9 – 13 Supplementary Figures

Figure S1 The bond lengths for Mo-O (black circles) and Nd/Fe-O (triangles) derived from refinement against neutron diffraction data collected at room temperature.

Figure S2 Neutron diffraction profiles collected at room temperature and 1.5 K from  $\text{Ba}_2\text{Nd}_{0.75}\text{Fe}_{0.25}\text{MoO}_6$ . Experimental and calculated profiles are shown as points and lines respectively. The vertical markers indicate the positions of allowed Bragg reflections from the tetragonal perovskite (upper marks) and the iron impurity (lower marks). The quality of fit is indicated by the parameters  $R_{\text{wp}} = 3.90$ ,  $\chi^2 = 6.94$  for 290 K and  $R_{\text{wp}} = 5.14$ ,  $\chi^2 = 12.07$  for the data collected at 1.5 K.

Figure S3 Magnetic susceptibility data collected from (top)  $\text{Ba}_2\text{Nd}_{0.95}\text{Fe}_{0.05}\text{MoO}_6$  in 1000 G field, (middle)  $\text{Ba}_2\text{Nd}_{0.90}\text{Fe}_{0.10}\text{MoO}_6$  in 1000 G field and (bottom)  $\text{Ba}_2\text{Nd}_{0.80}\text{Fe}_{0.20}\text{MoO}_6$  in 100 G field. Data are were collected after cooling in either zero applied magnetic field (circles) or after cooling in the measuring field cooled (triangles). The inset shows the Curie Weiss fit to the inverse susceptibility.

Figure S4 The temperature dependence of the resistivity of  $\text{Ba}_2\text{Nd}_{0.05}\text{Fe}_{0.95}\text{MoO}_6$  as a function of applied magnetic field. Data collected in zero applied field and 10 000 G are represented as black and red circles respectively.

Figure S5 The long-range ordered magnetic moment in  $\text{Ba}_2\text{Nd}_{0.95}\text{Fe}_{0.05}\text{MoO}_6$  derived from fitting neutron diffraction data collected at various temperatures between 1.5 K and room temperature. The error bars indicate one standard deviation in the Rietveld refinement.

# Ba<sub>2</sub>Nd<sub>0.9</sub>Fe<sub>0.1</sub>MoO<sub>6</sub> Room Temperature Structure

## # 8. Phase information from GSAS

```
_pd_phase_name
"from C:/GSAS/MyWork/Strathclyde/PXRD_D500/BaNdFeMoO/FC305/FC305_03"
_cell_length_a      5.99684(5)
_cell_length_b      5.99684
_cell_length_c      8.52234(11)
_cell_angle_alpha   90.0
_cell_angle_beta    90.0
_cell_angle_gamma   90.0
_cell_volume        306.482(7)
_symmetry_cell_setting tetragonal
_symmetry_space_group_name_H-M "I 4/m"
```

```
Ba
Ba1  0.0    0.5    0.25    1.0    Uiso  0.01185(18)  4
Mo
Mo1  0.0    0.0    0.5     1.0    Uiso  0.00554(15)  2
Nd
Nd1  0.0    0.0    0.0     0.9    Uiso  0.00554(15)  2
O-
O1   0.0    0.0    0.26920(18)  1.0    Uani  0.0185     4
O-
O2   0.24831(22)  0.29231(21)  0.0     1.0    Uani  0.01983    8
Fe
Fe1  0.0    0.0    0.0     0.1    Uiso  0.00554(15)  2

O1   0.0270(7)  0.0    0.0    0.0270(7)  0.0    0.0016(7)
O2   0.0134(8) -0.0050(7)  0.0    0.0180(6)  0.0    0.0281(6)
```

```
loop__atom_type_symbol
  _atom_type_number_in_cell
    Ba 4.0
    Mo 2.0
    Nd 1.8
    O- 12.0
    Fe 0.2
```

# If you change Z, be sure to change all 3 of the following

```
_chemical_formula_sum      "Ba2 Fe0.10 Mo Nd0.90 O6"
_chemical_formula_weight    601.99
_cell_formula_units_Z      2
```

# Ba<sub>2</sub>Nd<sub>0.8</sub>Fe<sub>0.2</sub>MoO<sub>6</sub> Room Temperature Structure

#####

## # 8. Phase information from GSAS

\_pd\_phase\_name  
"from C:/GSAS/MyWork/Strathclyde/Neutron/D2B/FC313\_Nd8Fe2/FC313\_RT\_"  
\_cell\_length\_a 5.9897(4)  
\_cell\_length\_b 5.9897  
\_cell\_length\_c 8.4662(10)  
\_cell\_angle\_alpha 90.0  
\_cell\_angle\_beta 90.0  
\_cell\_angle\_gamma 90.0  
\_cell\_volume 303.740(10)  
\_symmetry\_cell\_setting tetragonal  
\_symmetry\_space\_group\_name\_H-M "I 4/m"  
# ATOMIC COORDINATES AND DISPLACEMENT PARAMETERS

loop\_  
\_atom\_site\_type\_symbol  
\_atom\_site\_label  
\_atom\_site\_fract\_x  
\_atom\_site\_fract\_y  
\_atom\_site\_fract\_z  
\_atom\_site\_occupancy  
\_atom\_site\_thermal\_displace\_type  
\_atom\_site\_U\_iso\_or\_equiv  
\_atom\_site\_symmetry\_multiplicity  
Ba  
Ba1 0.0 0.5 0.25 1.0 Uiso 0.01232(30) 4  
Mo  
Mo1 0.0 0.0 0.5 1.0 Uiso 0.00717(27) 2  
Nd  
Nd1 0.0 0.0 0.0 0.8 Uiso 0.00717(27) 2  
O-  
O1 0.0 0.0 0.2666(13) 1.0 Uiso 0.01978(30) 4  
O-  
O2 0.2483(7) 0.2921(8) 0.0 1.0 Uiso 0.01978(30) 8  
Fe  
Fe1 0.0 0.0 0.0 0.2 Uiso 0.00717(27) 2

\_atom\_type\_number\_in\_cell  
Ba 4.0  
Mo 2.0  
Nd 1.6  
O- 12.0  
Fe 0.4

# If you change Z, be sure to change all 3 of the following

\_chemical\_formula\_sum "Ba2 Fe0.20 Mo Nd0.80 O6"  
\_chemical\_formula\_weight 593.16  
\_cell\_formula\_units\_Z 2

# Ba<sub>2</sub>Nd<sub>0.75</sub>Fe<sub>0.25</sub>MoO<sub>6</sub> Structure at Room Temperature

## # 8. Phase information from GSAS

```
_pd_phase_name          I4/m
_cell_length_a          5.9808(4)
_cell_length_b          5.9808
_cell_length_c          8.4543(10)
_cell_angle_alpha       90.0
_cell_angle_beta        90.0
_cell_angle_gamma       90.0
_cell_volume            302.410(10)
_symmetry_cell_setting  tetragonal
_symmetry_space_group_name_H-M  "I 4/m"
```

## # ATOMIC COORDINATES AND DISPLACEMENT PARAMETERS

```
loop_
  _atom_site_type_symbol
  _atom_site_label
  _atom_site_fract_x
  _atom_site_fract_y
  _atom_site_fract_z
  _atom_site_occupancy
  _atom_site_thermal_displace_type
  _atom_site_U_iso_or_equiv
  _atom_site_symmetry_multiplicity
Ba
BA1  0.0    0.5    0.25    1.0    Uiso  0.01437(28)  4
Nd
ND1  0.0    0.0    0.0     0.75   Uiso  0.00728(20)  2
Fe
Fe1  0.0    0.0    0.0     0.25   Uiso  0.00728(20)  2
Mo
Mo2  0.0    0.0    0.5     1.0    Uiso  0.00728(20)  2
O
O(1) 0.0    0.0    0.2673(25) 1.0    Uiso  0.0246(23)  4
O
O(2) 0.2501(13) 0.2870(12) 0.0     1.0    Uiso  0.0184(9)   8
```

```
loop__atom_type_symbol
  _atom_type_number_in_cell
    Ba 4.0
    Nd 1.5
    Fe 0.5
    Mo 2.0
    O 12.0
```

# If you change Z, be sure to change all 3 of the following

```
_chemical_formula_sum      "Ba2 Fe0.25 Mo Nd0.75 O6"
_chemical_formula_weight   588.74
_cell_formula_units_Z      2
```

# Ba<sub>2</sub>Nd<sub>0.75</sub>Fe<sub>0.25</sub>MoO<sub>6</sub> Structure at 2 K

## # 8. Phase information from GSAS

```
_pd_phase_name
"from C:/GSAS/MyWork/Strathclyde/Neutron/D2B/FC308_Nd75Fe25/FC308_1"
_cell_length_a      5.96349(21)
_cell_length_b      5.96349
_cell_length_c      8.4607(5)
_cell_angle_alpha   90.0
_cell_angle_beta    90.0
_cell_angle_gamma   90.0
_cell_volume        300.890(30)
_symmetry_cell_setting tetragonal
_symmetry_space_group_name_H-M "I 4/m"
```

## # ATOMIC COORDINATES AND DISPLACEMENT PARAMETERS

```
loop_
  _atom_site_type_symbol
  _atom_site_label
  _atom_site_fract_x
  _atom_site_fract_y
  _atom_site_fract_z
  _atom_site_occupancy
  _atom_site_thermal_displace_type
  _atom_site_U_iso_or_equiv
  _atom_site_symmetry_multiplicity
Ba
Ba1  0.0    0.5    0.25    1.0    Uiso  0.0110(4)  4
Mo
Mo1  0.0    0.0    0.5     1.0    Uiso  0.00731(33) 2
Nd
Nd1  0.0    0.0    0.0     0.75   Uiso  0.00731(33) 2
O-
O1   0.0    0.0    0.2756(6) 1.0    Uani  0.01019    4
O-
O2   0.2425(4) 0.2892(5) 0.0     1.0    Uani  0.02476    8
Fe
Fe1  0.0    0.0    0.0     0.25   Uiso  0.00731(33) 2

O1   0.0101(16) 0.0    0.0    0.0101(16) 0.0    0.0103(16)
O2   0.0019(17) -0.0020(13) 0.0    0.0243(18) 0.0    0.0481(21)
```

```
loop_ _atom_type_symbol
  _atom_type_number_in_cell
    Ba 4.0
    Mo 2.0
    Nd 1.5
    O- 12.0
    Fe 0.5
```

# If you change Z, be sure to change all 3 of the following

```
_chemical_formula_sum      "Ba2 Fe0.25 Mo Nd0.75 O6"
_chemical_formula_weight   588.74
_cell_formula_units_Z
```

# Ba<sub>2</sub>Nd<sub>0.10</sub>Fe<sub>0.90</sub>MoO<sub>6</sub> Room Temperature Structure

## # 8. Phase information from GSAS

```
_pd_phase_name
"from C:/gsas/MyWork/Strathclyde/PXRD_D500/BaNdFeMoO/FC314/FC314_02"
_cell_length_a      8.11566(4)
_cell_length_b      8.11566
_cell_length_c      8.11566
_cell_angle_alpha   90.0
_cell_angle_beta    90.0
_cell_angle_gamma   90.0
_cell_volume        534.530(9)
_symmetry_cell_setting cubic
_symmetry_space_group_name_H-M "F m -3 m"
```

## # ATOMIC COORDINATES AND DISPLACEMENT PARAMETERS

```
loop_
  _atom_site_type_symbol
  _atom_site_label
  _atom_site_fract_x
  _atom_site_fract_y
  _atom_site_fract_z
  _atom_site_occupancy
  _atom_site_thermal_displace_type
  _atom_site_U_iso_or_equiv
  _atom_site_symmetry_multiplicity
Ba
BA1  0.25  0.25  0.25  1.0  Uiso  0.00558(21)  8
Nd
ND2  0.0   0.0   0.0   0.1  Uiso  0.00556(15)  4
Fe
FE3  0.0   0.0   0.0   0.9  Uiso  0.00556(15)  4
Mo
MO4  0.5   0.5   0.5   1.0  Uiso  0.00556(15)  4
O
O5   0.25885(13)  0.0   0.0   1.0  Uani  0.00939  24
```

```
loop_ _atom_site_aniso_label
  _atom_site_aniso_U_11
  _atom_site_aniso_U_12
  _atom_site_aniso_U_13
  _atom_site_aniso_U_22
  _atom_site_aniso_U_23
  _atom_site_aniso_U_33
O5  0.0078(4)  0.0   0.0   0.01018(24)  0.0   0.01018(24)
```

```
loop_ _atom_type_symbol
  _atom_type_number_in_cell
  Ba 8.0
  Nd 0.4
  Fe 3.6
  Mo 4.0
  O 24.0
```

# If you change Z, be sure to change all 3 of the following

```
_chemical_formula_sum      "Ba2 Fe0.90 Mo Nd0.10 O6"
_chemical_formula_weight    531.28
_cell_formula_units_Z      4
```

# Ba<sub>2</sub>Nd<sub>0.05</sub>Fe<sub>0.95</sub>MoO<sub>6</sub> Room Temperature Structure

## # 8. Phase information from GSAS

```
_pd_phase_name
"from C:/gsas/MyWork/Strathclyde/PXRD_D500/BaNdFeMoO/FC316/FC316_02"
_cell_length_a      8.09519(4)
_cell_length_b      8.09519
_cell_length_c      8.09519
_cell_angle_alpha   90.0
_cell_angle_beta    90.0
_cell_angle_gamma   90.0
_cell_volume        530.496(8)
_symmetry_cell_setting      cubic
_symmetry_space_group_name_H-M  "F m -3 m"
```

## # ATOMIC COORDINATES AND DISPLACEMENT PARAMETERS

```
loop_
  _atom_site_type_symbol
  _atom_site_label
  _atom_site_fract_x
  _atom_site_fract_y
  _atom_site_fract_z
  _atom_site_occupancy
  _atom_site_thermal_displace_type
  _atom_site_U_iso_or_equiv
  _atom_site_symmetry_multiplicity
Ba
BA1  0.25    0.25    0.25    1.0    Uiso  0.00322(22)  8
Nd
ND2  0.0     0.0     0.0     0.05   Uiso  0.00329(17)  4
Fe
FE3  0.0     0.0     0.0     0.95   Uiso  0.00329(17)  4
Mo
MO4  0.5     0.5     0.5     1.0    Uiso  0.00329(17)  4
O
O5   0.25786(13)  0.0     0.0     1.0    Uani  0.00656      24
```

```
loop_ _atom_site_aniso_label
  _atom_site_aniso_U_11
  _atom_site_aniso_U_12
  _atom_site_aniso_U_13
  _atom_site_aniso_U_22
  _atom_site_aniso_U_23
  _atom_site_aniso_U_33
O5   0.0047(4)  0.0     0.0     0.00750(25)  0.0     0.00750(25)
```

```
loop_ _atom_type_symbol
  _atom_type_number_in_cell
  Ba 8.0
  Nd 0.2
  Fe 3.8
  Mo 4.0
  O 24.0
```

# If you change Z, be sure to change all 3 of the following

```
_chemical_formula_sum      "Ba2 Fe0.95 Mo Nd0.05 O6"
_chemical_formula_weight    526.86
_cell_formula_units_Z      4
```



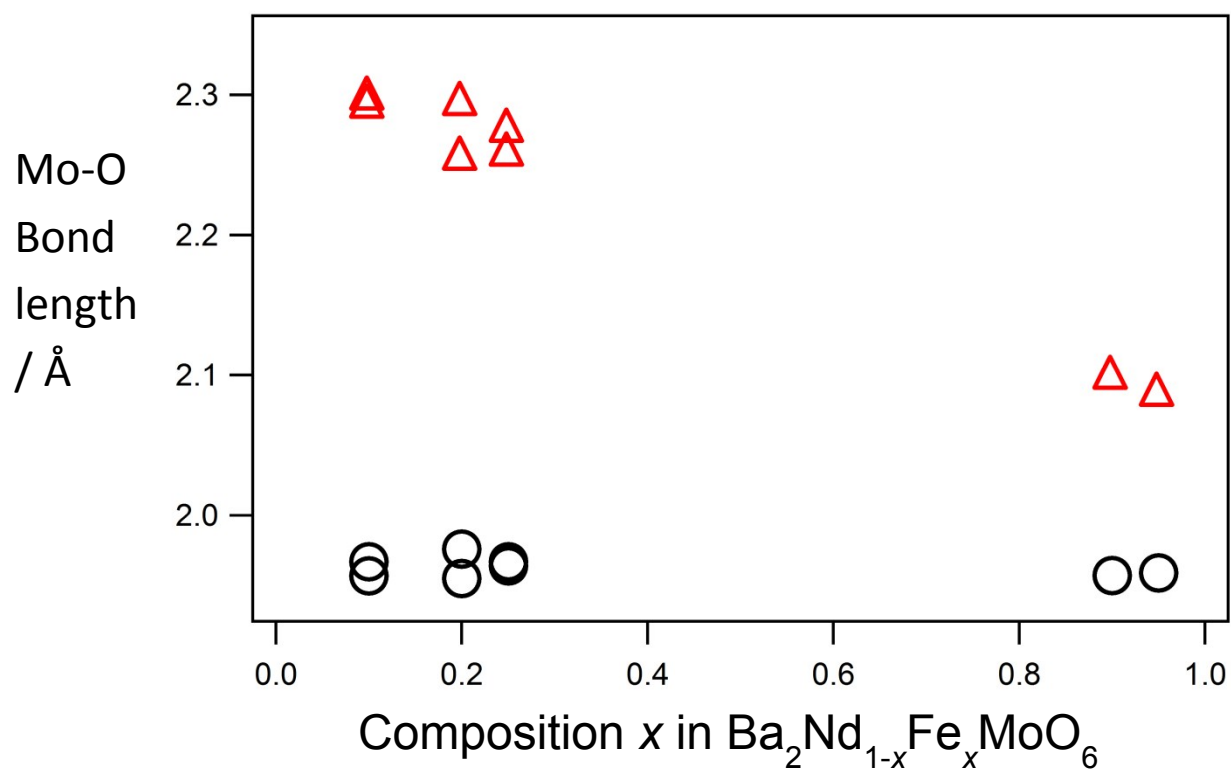

Figure S1

The bond lengths for Mo-O (black circles) and Nd/Fe-O (triangles) derived from refinement against neutron diffraction data collected at room temperature.

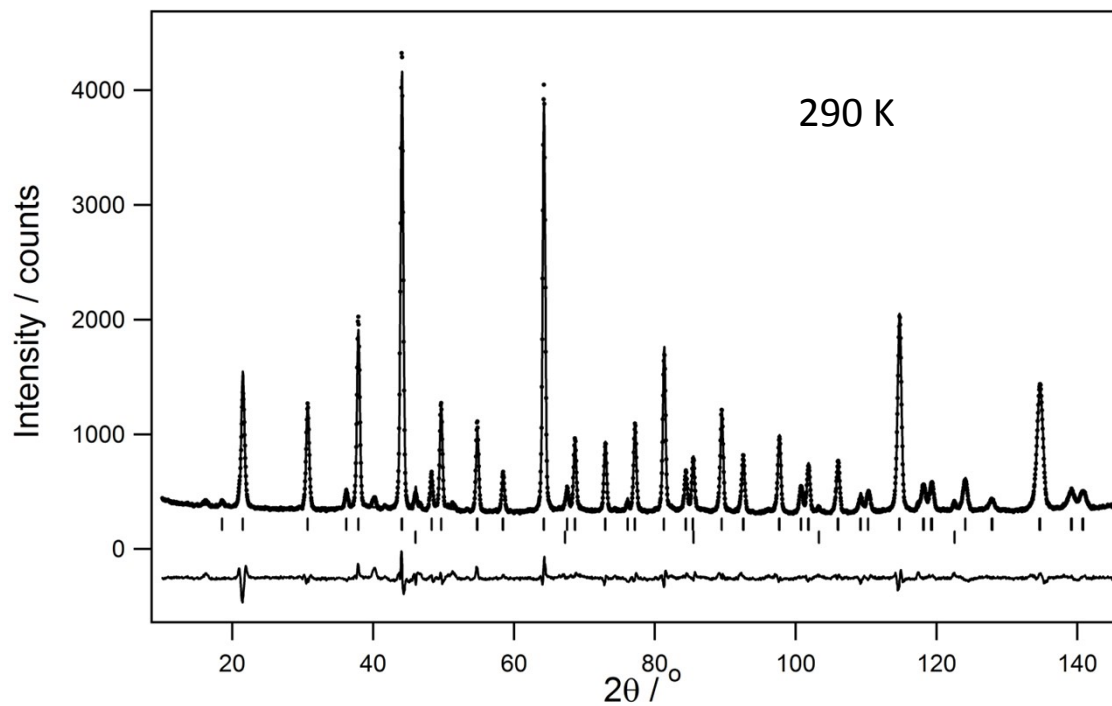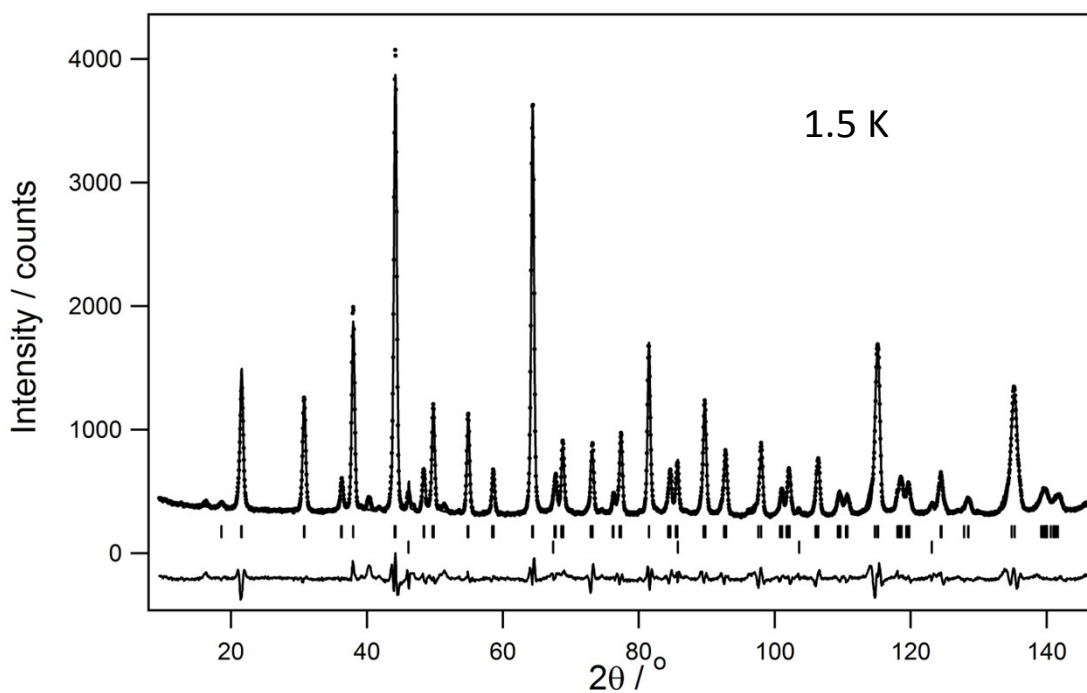

Figure S2 Neutron diffraction profiles collected at room temperature and 1.5 K from  $\text{Ba}_2\text{Nd}_{0.75}\text{Fe}_{0.25}\text{MoO}_6$ . Experimental and calculated profiles are shown as points and lines respectively. The vertical markers indicate the positions of allowed Bragg reflections from the tetragonal perovskite (upper marks) and the iron impurity (lower marks). The quality of fit is indicated by the parameters  $R_{\text{wp}} = 3.90$ ,  $\chi^2 = 6.94$  for 290 K and  $R_{\text{wp}} = 5.14$ ,  $\chi^2 = 12.07$  for the data collected at 1.5 K.

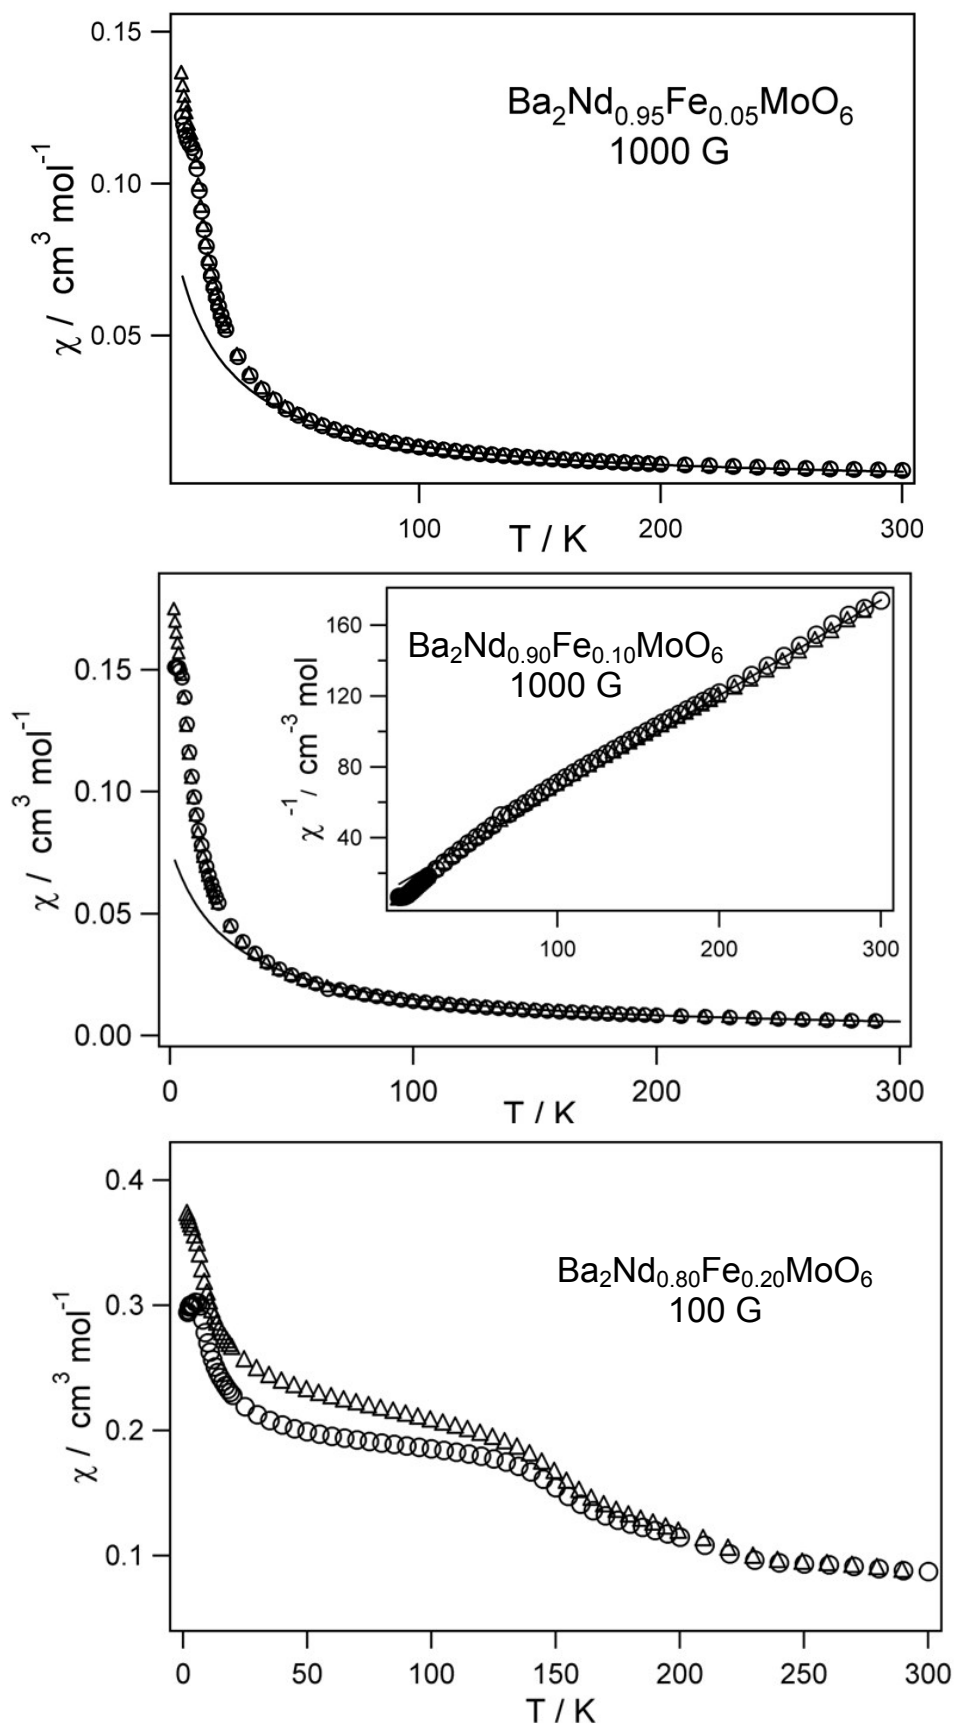

Figure S3 Magnetic susceptibility data collected from (top)  $\text{Ba}_2\text{Nd}_{0.95}\text{Fe}_{0.05}\text{MoO}_6$  in 1000 G field, (middle)  $\text{Ba}_2\text{Nd}_{0.90}\text{Fe}_{0.10}\text{MoO}_6$  in 1000 G field and (bottom)  $\text{Ba}_2\text{Nd}_{0.80}\text{Fe}_{0.20}\text{MoO}_6$  in 100 G field. Data are were collected after cooling in either zero applied magnetic field (circles) or after cooling in the measuring field cooled (triangles). The inset shows the Curie Weiss fit to the inverse susceptibility.

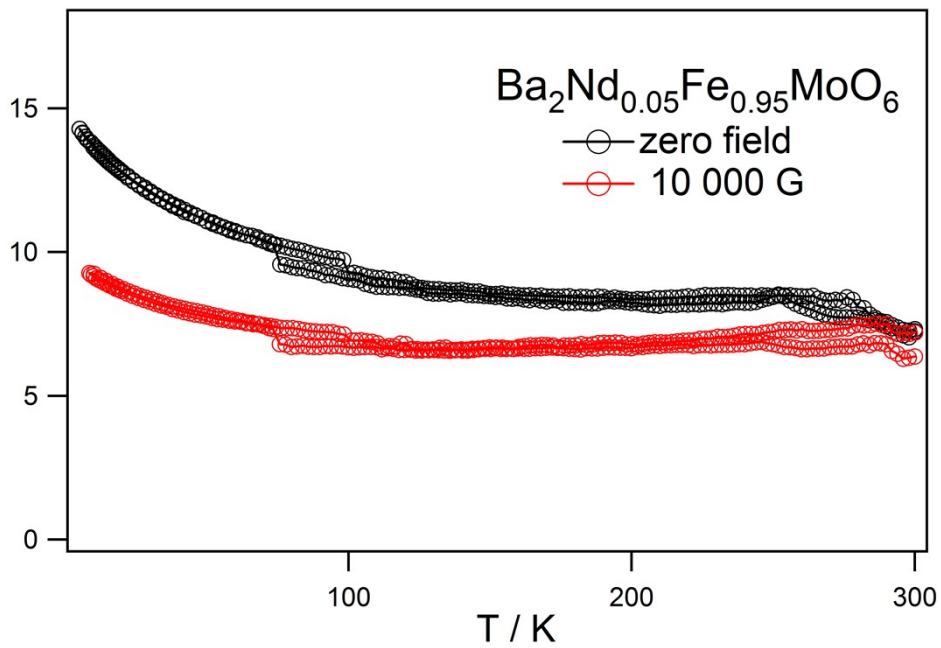

Figure S4 The temperature dependence of the resistivity of  $\text{Ba}_2\text{Nd}_{0.05}\text{Fe}_{0.95}\text{MoO}_6$  as a function of applied magnetic field. Data collected in zero applied field and 10 000 G are represented as black and red circles respectively.

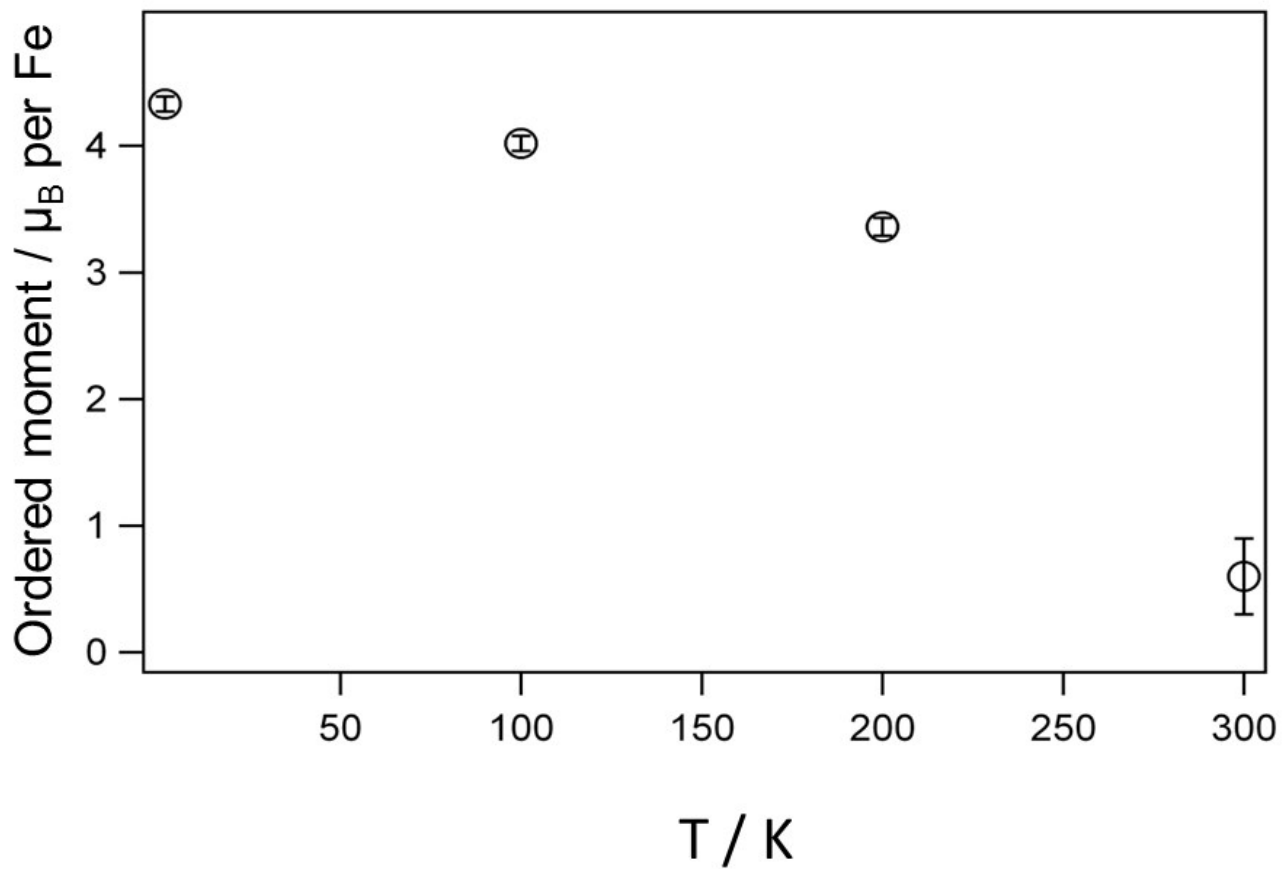

Figure S5 The long-range ordered magnetic moment in  $\text{Ba}_2\text{Nd}_{0.95}\text{Fe}_{0.05}\text{MoO}_6$  derived from fitting neutron diffraction data collected at various temperatures between 1.5 K and room temperature. The error bars indicate one standard deviation in the Rietveld refinement.
